# Supplementary material for: High-dose consumption of NaCl resulted in severe degradation of lipoproteins associated with hyperlipidemia, hyperglycemia, and infertility via impairment of testicular spermatogenesis
Source: Royal Society of Chemistry journal article supplement (doi:10.1039/c5tx00059a), 2016-01-01
Supplement: c5tx00059a1.pdf [file c5tx00059a1.pdf]

# Ovary

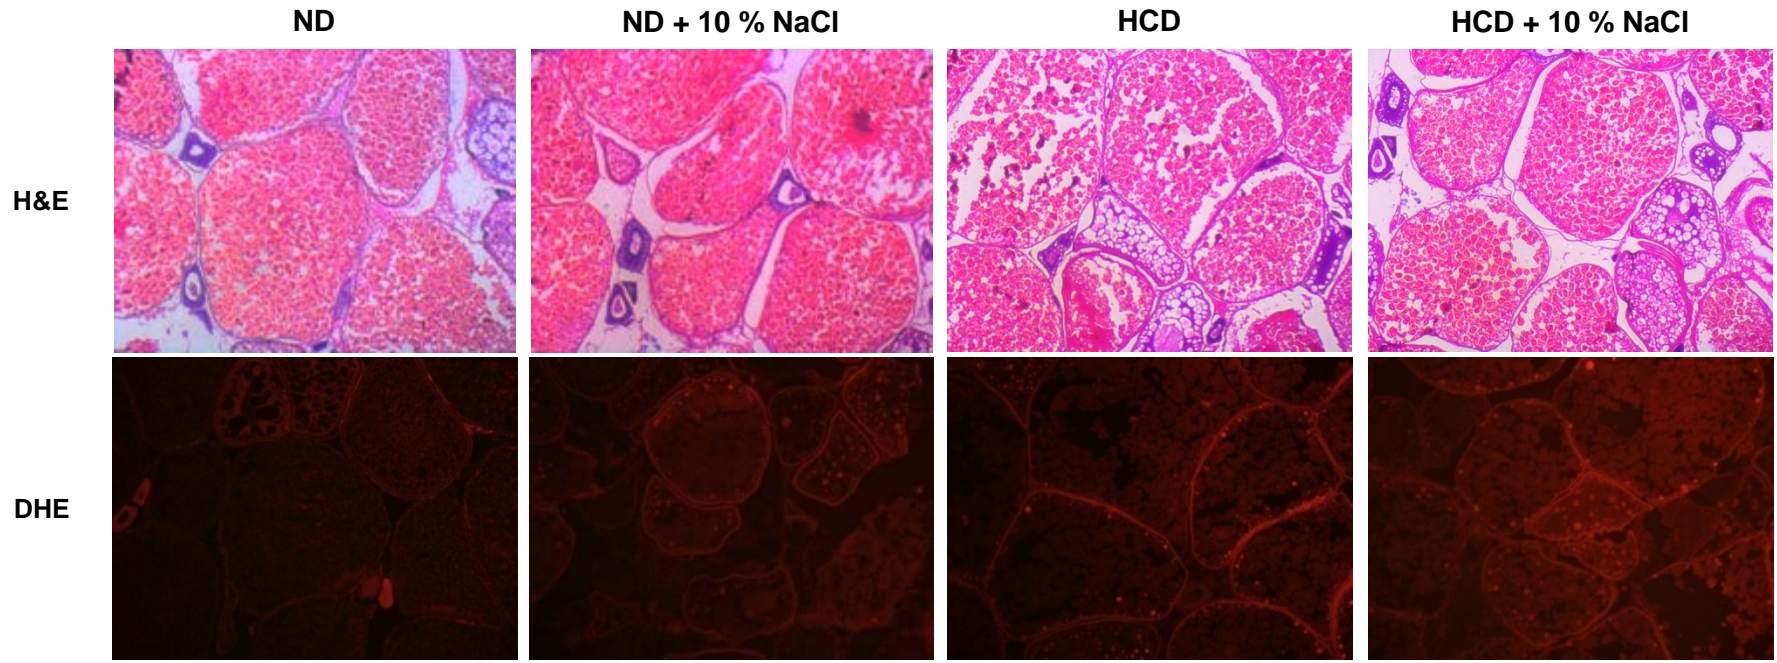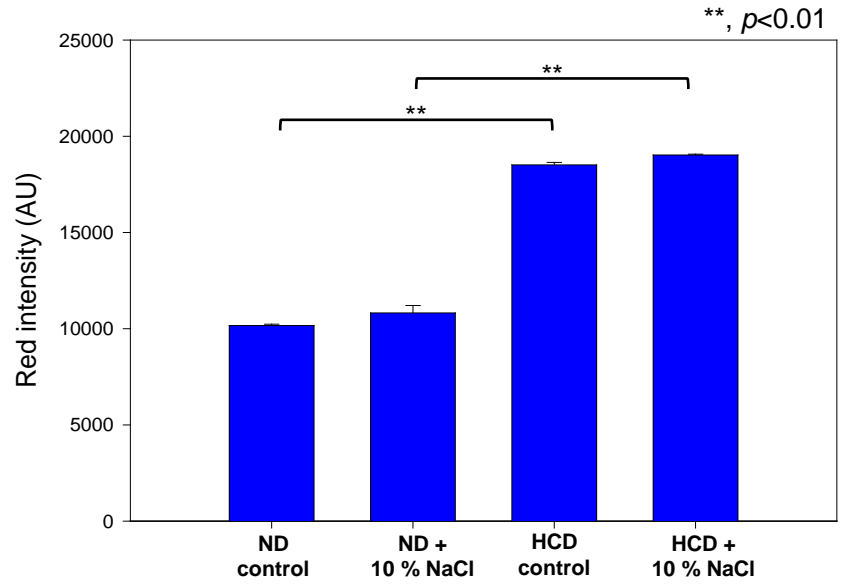

Suppl Fig. 1. Ovarian histology. H&E and DHE staining of frozen ovarian tissues from zebrafish fed normal diet (ND), 10% NaCl diet (NaCl), high cholesterol diet (HCD), and high salt plus high cholesterol (NaCl plus HCD) for 21 weeks.

# Suppl. Fig. 2

## A

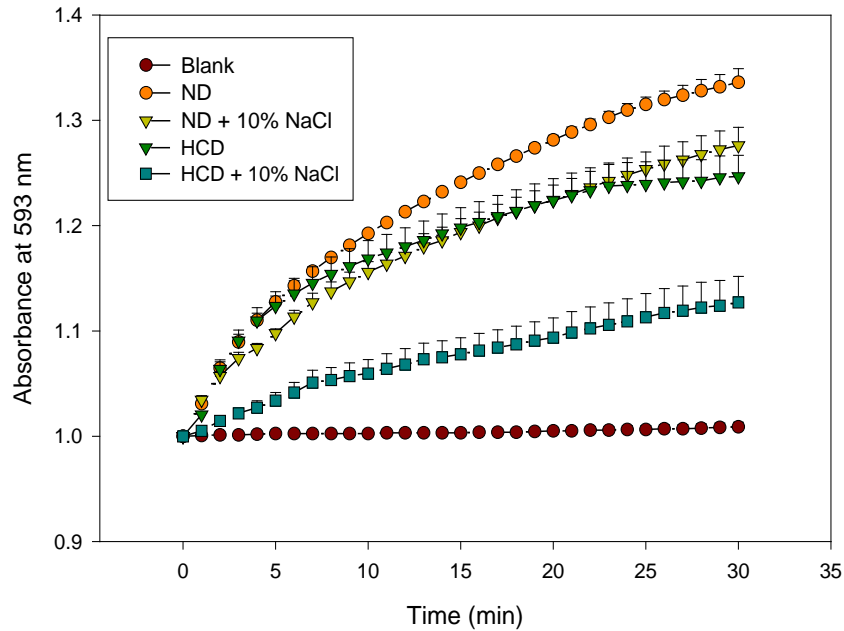

## B

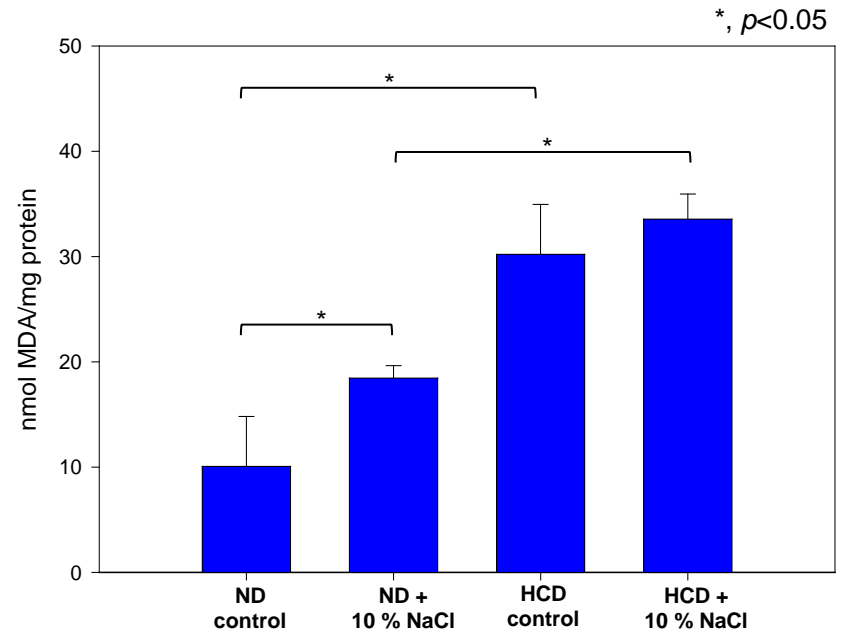

Suppl Fig. 2. Antioxidant ability of hepatic tissue.

A. Ferric ion-reducing ability in hepatic tissue homogenate.

B. Determination of oxidized species using the TBARS method with homogenate of hepatic tissue.
